# Supplementary material for: Assessment of inflammation in patients with rheumatoid arthritis using thermography and machine learning: a fast and automated technique
Source: HighWire-hosted journal article supplement (doi:10.1136/rmdopen-2022-002458), 2022-07-01

## Assessment of inflammation in patients with rheumatoid arthritis using thermography and machine learning: a fast and automated technique.

### Supplementary

**Supplementary table S1:** Main specifications of the thermal cameras used in this study.

|                                        | FLIR ONE PRO                                | THERMAL EXPERT TE-Q1                            |
|----------------------------------------|---------------------------------------------|-------------------------------------------------|
| <b>Wavelength band</b>                 | 8 to 14 $\mu\text{m}$                       | 8 to 14 $\mu\text{m}$                           |
| <b>Detector type</b>                   | Uncooled microbolometer                     | Uncooled microbolometer                         |
| <b>Thermal resolution</b>              | 160x120 pixels                              | 384x288 pixels                                  |
| <b>Thermal sensitivity</b>             | 70 mk                                       | < 50 mk                                         |
| <b>Scene temperature range</b>         | -20°C to 400°C                              | -10°C to 150°C                                  |
| <b>Non-uniformity correction (NUC)</b> | Integrated with shutter                     | Manual using lens cap                           |
| <b>Focus</b>                           | Fixed 15 cm — Infinity                      | Adjustable from 20 cm to infinite (6.8 mm lens) |
| <b>Manufacturer</b>                    | Teledyne FLIR LLC<br>(Wilsonville, OR, USA) | i3system, Inc. (Daejeon,<br>Republic of Korea)  |

**Supplementary table S2:** Analysis of the area under the receiver operating curve (AUROC) of the Thermographic Joint Inflammation Score (ThermoJIS) for the detection of active synovitis in different age and gender groups.

|                                     | <b>n</b> | <b>AUROC</b>                        |
|-------------------------------------|----------|-------------------------------------|
| <b>Age (years) ≤ 45</b>             | 30       | 0.78 (95% CI, 0.61 to 0.96; p<0.01) |
| <b>Age (years) &gt; 45 and ≤ 55</b> | 39       | 0.81 (95% CI, 0.67 to 0.95; p<0.01) |
| <b>Age (years) &gt; 55 and ≤ 65</b> | 39       | 0.73 (95% CI, 0.56 to 0.90; p<0.05) |
| <b>Age (years) &gt; 65</b>          | 38       | 0.81 (95% CI, 0.63 to 1.00; p<0.01) |
| <b>Male</b>                         | 29       | 0.83 (95% CI, 0.67 to 0.99; p<0.01) |
| <b>Female</b>                       | 117      | 0.77 (95% CI, 0.68 to 0.85; p<0.01) |

**Supplementary figure S1:** Diagram of the participants of the study.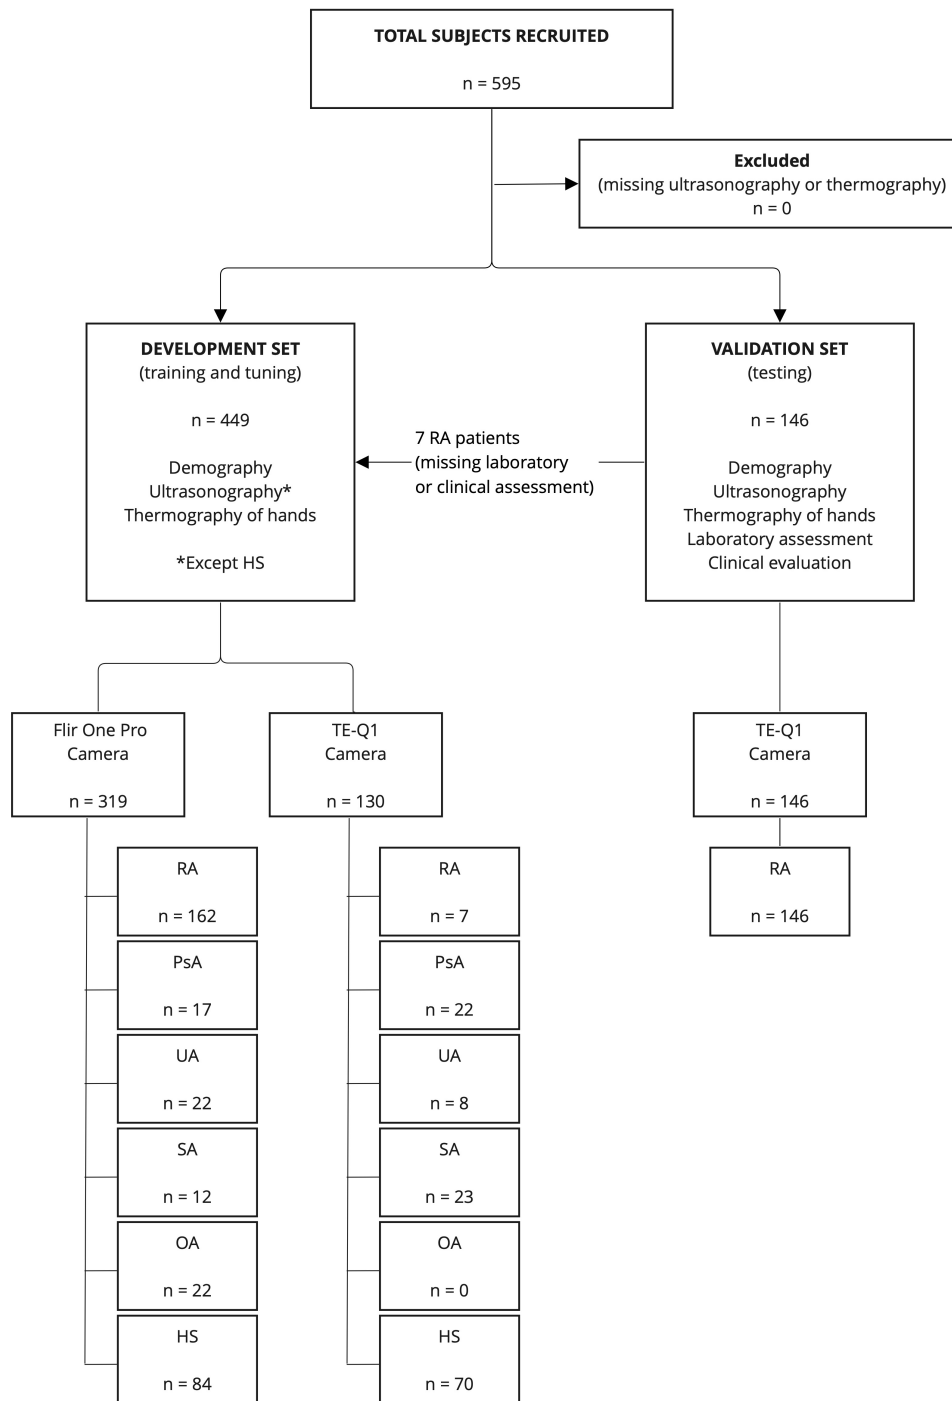

RA, rheumatoid arthritis; PsA, psoriatic arthritis; UA, undifferentiated arthritis; SA, arthritis of hands secondary to other diseases; OA, osteoarthritis; HS, healthy subjects;

**Supplementary figure S2:** Distribution of ThermoJIS values from the validation set.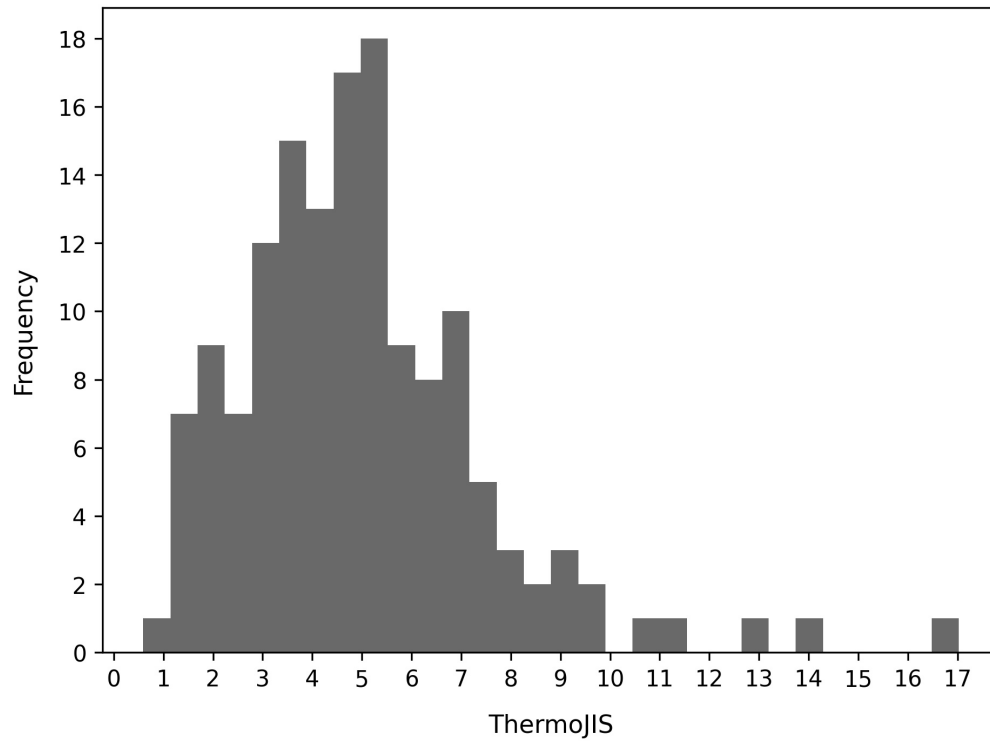

**Supplementary figure S3:** Analysis of the precision-recall curve (PRC) of the ThermoJIS score for the detection of active synovitis. a) Considering the entire validation set (Average Precision, 0.79; Baseline Precision, 0.53); b) Considering the ThermoJIS values lower than 3.46 and greater than 5.65 of the validation set (Average Precision, 0.86; Baseline Precision, 0.47). The baseline precision (dotted line) is the proportion of positives in the set, i.e., the random precision.

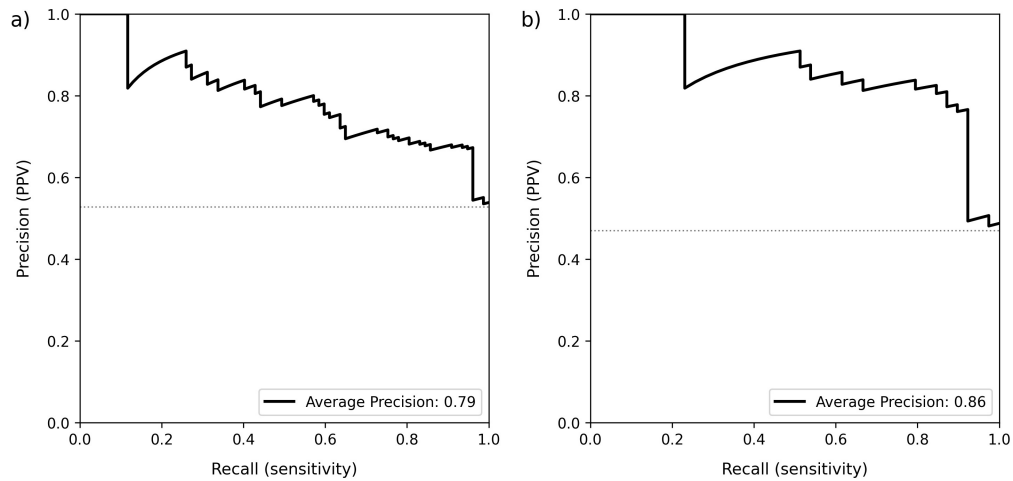

Supplement: rmdopen-2022-002458supp001_data_supplement.pdf [file rmdopen-2022-002458supp001_data_supplement.pdf]
